# Supplementary material for: Maternal High-Fat Diet Programs Offspring Liver Steatosis in a Sexually Dimorphic Manner in Association with Changes in Gut Microbial Ecology in Mice
Source: PubMed Central journal article supplement (PMC6220325; doi:10.1038/s41598-018-34453-0), 2018-11-07
Supplement: 41598_2018_34453_MOESM1_ESM.pdf [file 41598_2018_34453_MOESM1_ESM.pdf]

**Maternal High-fat Diet Programs Offspring Liver Steatosis in a Sexually Dimorphic Manner in Association with Changes in Gut Microbial Ecology in Mice**

Umesh D. Wankhade<sup>1,2</sup>, Ying Zhong<sup>2</sup>, Ping Kang<sup>2</sup>, Maria Alfaro<sup>3</sup>, Sree V. Chintapalli<sup>1,2</sup>, Brian D. Piccolo<sup>1,2</sup>, Kelly E. Mercer<sup>1,2</sup>, Aline Andres<sup>1,2</sup>, Keshari M. Thakali<sup>1,2</sup>, Kartik Shankar<sup>1,2\*</sup>

## Supplementary figure 1

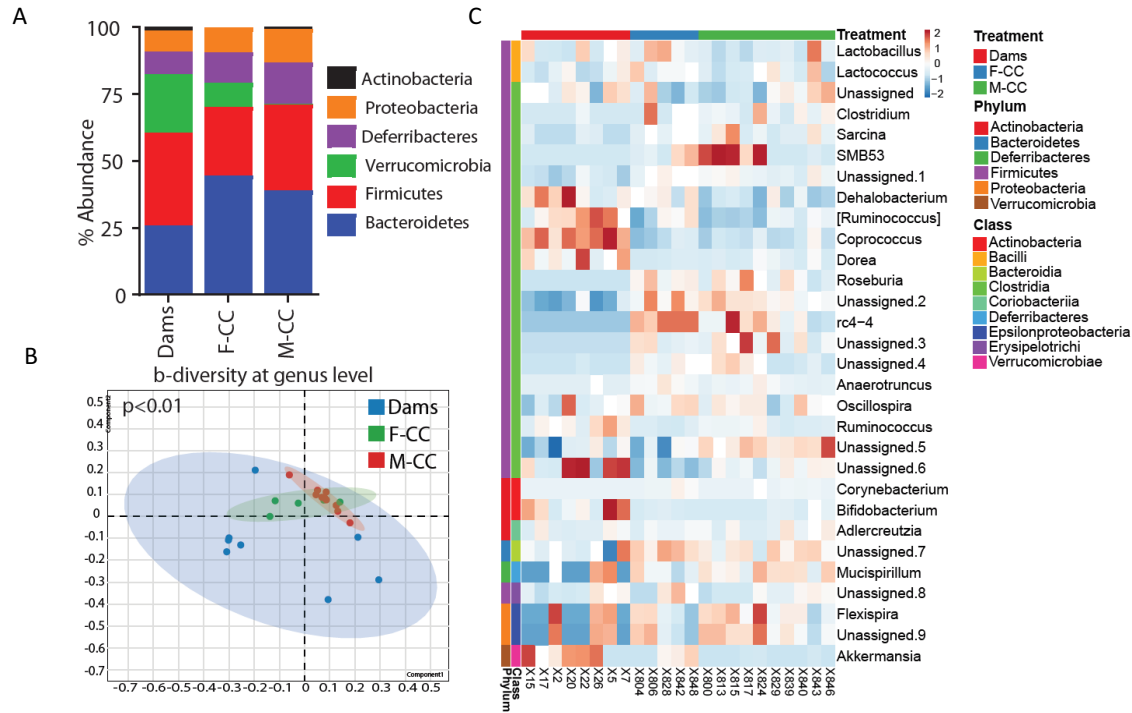

**Supplementary Figure 1 – Comparison between maternal and offspring microbiome. (A)** Stacked histogram showing distribution of phylum level abundance and **(B)** Non-metric multidimensional scaling (NMDS) ordination of the OTU dissimilarity matrix of  $\beta$ -diversity values between dams, male and female offspring microbiome. **(C)** Heatmaps depicting genus level distribution in dams, male and female offspring microbiome.

**Supplementary Table 1: Primer Sequences used for real time PCR**

| Gene           | Forward                  | Reverse                 |
|----------------|--------------------------|-------------------------|
| Cidec          | CCTTCGACCTGTACAAGCTGAA   | GCAGTGCAGGTCATAGGAAAGC  |
| Ppar- $\gamma$ | GCTTCCACTATGGAGTTCATGCT  | CCGGCAGTTAAGATCACACCTAT |
| Cd36           | CTGTGTCTTTTGTACAGCCCAATG | AGCTGCTACAGCCAGATTCAGAA |
| Cyp7a1         | CAGGGAGATGCTCTGTGTTCAC   | ACCCAGACAGCGCTCTTTGAT   |
| Cyp8b1         | AGCCACAGCCTTCAAGTATGA    | AGGCATGCTGTAGTGGTGGAT   |
| Cyp39a1        | CCTGGCGCTGTTTGAGAAAA     | CCGTCTCCACCACTTCCAATA   |
| Cyp27a1        | TGATGAGACAGGAGGGCAAGT    | TTGTGCGATGAAGATCCCATAG  |
